# Supplementary material for: Genotype-phenotype correlations and long-term efficacy of pamidronate therapy in patients with osteogenesis imperfecta
Source: PubMed Central journal article supplement — Ann Pediatr Endocrinol Metab. 2022 Jan 25;27(1):22–9. doi: 10.6065/apem.2142144.072 (PMC8984751; doi:10.6065/apem.2142144.072), 2022-01-25
Supplement: apem-2142144-072-suppl.pdf [file apem-2142144-072-suppl.pdf]

**Supplementary Table 1. Scoring system for patients with osteogenesis imperfecta**

| Criterion/points                               | 1            | 2                                          | 3                                                                                                           | 4                                                                                                       |
|------------------------------------------------|--------------|--------------------------------------------|-------------------------------------------------------------------------------------------------------------|---------------------------------------------------------------------------------------------------------|
| Annual fracture frequency                      | 0–1          | 2–5                                        | 6–10                                                                                                        | >11                                                                                                     |
| Gross motor development                        | No deformity | Delayed with catch-up                      | Delayed with no catch-up                                                                                    | Abnormal/arrested                                                                                       |
| Degree of long bones deformities and scoliosis | No deformity | Mild (noticed only on x-ray), no scoliosis | Moderate (noticed on both clinical examination and x-rays), affecting isolated long bones) ± mild scoliosis | Severe (clearly visible on clinical examination and x-rays affecting all long bones), +severe scoliosis |
| Height-SDS                                     | >-2.0        | -2.1 to -3.0                               | -3.1 to -5.0                                                                                                | <-5.0                                                                                                   |
| BMD z-score                                    | Normal       | Osteopenia                                 | Severe osteopenia                                                                                           | Osteoporosis                                                                                            |

Scores and degree of severity: 5–10, mild; 11–15, moderate; 16–20, severe.  
 SDS, standard deviation score; BMD, bone mineral density.
